1 **Quantitative profiling of 1-Carbon Metabolites, Amino Acids and Precursors,**  
2 **and Plasmalogens in human plasma using Ultra-High-Pressure Liquid**  
3 **Chromatography coupled with Tandem Mass Spectrometry and robotic**  
4 **compound extraction**

---

5 **Stephanie Andraos<sup>1</sup>, Michael Goy<sup>1</sup>, Ben Albert<sup>1</sup>, Martin Kussmann<sup>1,2</sup>, Eric B.**  
6 **Thorstensen<sup>1,\*</sup>, Justin M. O'Sullivan<sup>1,2</sup>**

7  
8 <sup>1</sup> Liggins Institute, The University of Auckland, New Zealand

9 <sup>2</sup> New Zealand National Science Challenge "High-Value Nutrition", New Zealand

10  
11 **\*Correspondence:** For queries and correspondence, please contact  
12 Eric Thorstensen via email: [e.thorstensen@auckland.ac.nz](mailto:e.thorstensen@auckland.ac.nz)  
13

---

14 **Abstract (80 to 250 words)**

15 Amino acids (AAs) and one-carbon (1-C) compounds are involved in a range of key metabolic  
16 pathways, and mediate numerous health and disease processes in the human body.  
17 Previous assays have quantified a limited selection of these compounds. Here, we describe  
18 an analytical method for the simultaneous quantification of 37 1-C metabolites, amino acids,  
19 precursors, and plasmalogens using reversed-phase ultra-high pressure liquid  
20 chromatography coupled with tandem mass spectrometry (UHPLC-MS/MS). Compound  
21 extraction from human plasma was tested manually before being robotically automated.  
22 The final analytical panel was validated on human plasma samples. Our automated and  
23 multiplexed method holds promise for application to large cohort studies.

24 **1. Introduction**

25 In the 1930s, Donal Van Slyke and Robert Dillon were some of the first scientists to develop  
26 a method for the analysis of free amino acids using crude analytical methods (1). Since then,  
27 the comprehensive analysis of low-molecular weight metabolites (*i.e.* metabolomics) has  
28 progressed thanks to advanced technology, in particular the coupling of chromatography  
29 and mass spectrometry, to enable their accurate quantitation in biological samples (2,3).  
30 Several metabolomics methods have been developed for amino acids and/or 1-C  
31 metabolism compound quantification in different body fluids (*e.g.* plasma, cerebrospinal  
32 fluid, red blood cells) (4,5). However, on their own, each of these methods only quantifies a  
33 limited selection of metabolites (4,5).

34 **1.1 Amino acids and 1-C metabolites in human health**

35 Amino acids and 1-C metabolites are central to physiological processes in the human body  
36 (*e.g.* nutritional metabolism, molecular, endocrine and neurological functions) (6). Due to  
37 their ubiquitous involvement in biological processes, quantifying the concentration of amino  
38 acids and 1-C compounds in human plasma can inform on the physiological status of an  
39 individual. Specific metabolic profiles have been linked to health and disease outcomes  
40 (7,8). Estimating nutritional status using dietary reporting alone is unreliable (9). Therefore,

41 an objective quantitation of nutritional metabolites is of utmost importance, to strengthen  
42 our current understanding of human physiology and nutritional metabolism.

### 43 **1.2 The use of human plasma for quantitative metabolomics**

44 Plasma is the non-cellular component of human blood. As such, plasma contains virtually all  
45 human proteins (*e.g.* blood clotting, binding proteins) representing those expressed  
46 throughout the tissues in addition to glucose, vitamins, and other nutrients. Blood collection  
47 from human subjects is relatively easy and non-invasive making it particularly appealing in  
48 both clinical and research settings (10). In a healthy population, blood metabolites (*e.g.*  
49 amino acids) typically maintain homeostatic levels when in a fasted state, but may fluctuate  
50 substantially in the post-prandial state (11). Therefore, physiological extrapolations need to  
51 be made cautiously when interpreting the results of plasma metabolomics studies, as these  
52 reflect either states of homeostasis (in the fasted state), a postprandial response (in the fed  
53 state), or metabolic exchanges between tissues. Notably, plasma-tissue correlations of  
54 metabolites are not always reliable (11). For example, metabolites quantified in plasma are  
55 typically not able to be assigned to cells or tissues of origin. However, an increasing level of  
56 biological understanding of tissue-specific pathways has allowed for the development of  
57 mathematical models, extrapolating organ-specific metabolite levels based on their plasma  
58 measurements (12,13).

59 Here we present an automated method that combines a robotic extraction of plasma  
60 samples with reversed-phase ultra-high-pressure liquid chromatography coupled with  
61 tandem mass spectrometry (UHPLC-MS/MS) to quantitate 37 1-C metabolites, amino acids  
62 and precursors, as well as plasmalogens in a single plasma sample. This method has wide  
63 applicability for metabolomic studies using non-invasive sample collection methods.

## 64 **Materials and Methods**

### 65 **Ethics**

66 Plasma samples used for method validation were obtained from the Fish Oil in Pregnancy  
67 trial, approved by the Northern A ethics Health & Disabilities Committees (Trial number  
68 17/NTA/154). Participants provided written informed consent, and the trial was conducted  
69 according to the principles of the declaration of Helsinki.

### 70 **Materials**

71 Materials used throughout the experiment are detailed in Supplementary table 1.

### 72 **Plasma sample collection**

73 Whole blood was collected in lithium heparin and EDTA blood collection tubes. Plasma was  
74 separated by centrifugation ( $1300 \times g$ ,  $4^{\circ}\text{C}$ , 15 min), then stored ( $-80^{\circ}\text{C}$ ).

### 75 **Standard preparation and quality controls**

76 A labelled amino-acid premix solution containing: L-Arginine:HCL ( $^{13}\text{C}_6$ , 99%;  $^{15}\text{N}_4$ , 99%); L-  
77 Aspartic acid ( $^{13}\text{C}_4$ , 99%;  $^{15}\text{N}$ , 99%); L-Cystine ( $^{13}\text{C}_6$ , 99%;  $^{15}\text{N}_2$ , 99%); L-Glutamic acid ( $^{13}\text{C}_5$ ,  
78 99%;  $^{15}\text{N}$ , 99%); L-Histidine:HCL:H<sub>2</sub>O (<5% D) (U- $^{13}\text{C}_6$ , 97-99%; U- $^{15}\text{N}_3$ , 97-99%); L-Isoleucine  
79 ( $^{13}\text{C}_6$ , 99%;  $^{15}\text{N}$ , 99%); L-Leucine( $^{13}\text{C}_6$ , 99%;  $^{15}\text{N}$ , 99%); L-Methionine ( $^{13}\text{C}_5$ , 99%;  $^{15}\text{N}$ , 99%); L-  
80 Phenylalanine ( $^{13}\text{C}_9$ , 99%;  $^{15}\text{N}$ , 99%); L-Proline ( $^{13}\text{C}_5$ , 99%;  $^{15}\text{N}$ , 99%); L-Threonine ( $^{13}\text{C}_4$ , 97-

81 99%; <sup>15</sup>N, 97-99%); L-Tyrosine (<sup>13</sup>C9, 99%; <sup>15</sup>N, 99%); and L-Valine (<sup>13</sup>C5, 99%; <sup>15</sup>N, 99%)  
 82 (*Cambridge Isotope*) was diluted to 33 μM in 1% ascorbic acid MilliQ® H<sub>2</sub>O (Millipore). Stock  
 83 solutions of labelled 1-C compounds were prepared from their corresponding powders of:  
 84 Homocysteine d4 (Novachem (CIL)); Cystathionine d4 (Novachem (CIL)); S-  
 85 Adenosylhomocysteine d4 (Sapphire bioscience (Cayman)); 5-Methyltetrahydrofolate d3  
 86 (Sapphire Bioscience Pty Ltd); Betaine d3 (SciVac PTY. Ltd. (CDN)), Dimethylglycine d3  
 87 (SciVac PTY. Ltd. (CDN)); and Taurine d4 (SciVac PTY. Ltd. (CDN)) diluted in 0.1 M HCl for all  
 88 standards, except for 5-MTHF d3, which was diluted in 10 mM ammonium acetate (NH<sub>4</sub>OAc)  
 89 with 10% ascorbic acid and 2% TCEP, at concentrations ranging from 0.5 to 5 mM. These  
 90 stock solutions were then diluted to 33 μM in 1% ascorbic acid MilliQ® H<sub>2</sub>O. A 1:1 mixture of  
 91 labelled AAs and 1-C compounds was used as the internal standard solution.

92 Dilution series' of unlabelled amino acids (Kit No. LAA-21, SIGMA® Chemical company, USA)  
 93 and 1-C metabolites were prepared at concentrations ranging from 1μM to 1000μM  
 94 (Supplementary tables 2 and 3), and mixed in a 1:1 ratio to create standard 8 (S8; Table 1).  
 95 The unlabelled standards consisted of Lysine, Taurine, OH-Proline, Proline, Aspartic acid,  
 96 Glutamine, Glycine, Serine, Asparagine, Glutamic acid, Dimethylglycine, Citrulline, Proline,  
 97 Betaine, Threonine, Cysteine, Ethanolamine, Alanine, Amino adipic acid, Homocysteine,  
 98 Ornithine, Valine, Carnitine, Tyrosine, Choline, Methionine, Betaine, Cystathionine,  
 99 Phenylalanine, Isoleucine, Leucine, Histidine, Arginine, S-Adenosylhomocysteine,  
 100 Tryptophan, S-Adenosylmethionine, 1-Methylhistidine, 3-Methylhistidine, and 5-  
 101 Methyltetrahydrofolate (all purchased from Sigma Aldrich). Dilutions of unlabelled mixes  
 102 were prepared to create a wide dynamic range of concentrations that mirrors known  
 103 physiological plasma concentrations (Table 1).

104 Stripped human plasma (SeraCare Life Sciences Inc.) was used as a quality control (QC)  
 105 matrix to calculate compound recoveries. Triplicate QCs of stripped plasma at baseline and  
 106 stripped plasma spiked with 70 μL of calibration standards (S7 and S8) were used for quality  
 107 control checking.

| <b>Compound</b>  | <b>S1</b> | <b>S2</b> | <b>S3</b> | <b>S4</b> | <b>S5</b> | <b>S6</b> | <b>S7</b> | <b>S8</b> | <b>Unit</b> |
|------------------|-----------|-----------|-----------|-----------|-----------|-----------|-----------|-----------|-------------|
| Homocysteine     | 0.2       | 1         | 2         | 5         | 10        | 20        | 40        | 100       | μM          |
| Choline          | 0.4       | 2         | 4         | 10        | 20        | 40        | 80        | 200       | μM          |
| Dimethyl glycine |           |           |           |           |           |           |           |           | μM          |
| Glutamic acid    |           |           |           |           |           |           |           |           | μM          |
| Ornithine        |           |           |           |           |           |           |           |           | μM          |
| Methionine       |           |           |           |           |           |           |           |           | μM          |
| Tyrosine         |           |           |           |           |           |           |           |           | μM          |
| Isoleucine       |           |           |           |           |           |           |           |           | μM          |
| Phenylalanine    |           |           |           |           |           |           |           |           | μM          |

|                                       |     |     |    |      |     |     |      |      |    |
|---------------------------------------|-----|-----|----|------|-----|-----|------|------|----|
| Tryptophan                            |     |     |    |      |     |     |      |      | μM |
| Ethanolamine                          |     |     |    |      |     |     |      |      | μM |
| Amino adipic acid                     |     |     |    |      |     |     |      |      | μM |
| Aspartic acid                         |     |     |    |      |     |     |      |      | μM |
| Citrulline                            |     |     |    |      |     |     |      |      | μM |
| 1-methylhistidine                     |     |     |    |      |     |     |      |      | μM |
| 3-methylhistidine                     |     |     |    |      |     |     |      |      | μM |
| OH-Proline                            |     |     |    |      |     |     |      |      | μM |
| Histidine                             |     |     |    |      |     |     |      |      | μM |
| Asparagine                            |     |     |    |      |     |     |      |      | μM |
| Cysteine                              | 0.5 | 2.5 | 5  | 12.5 | 25  | 50  | 100  | 250  | μM |
| Betaine                               |     |     |    |      |     |     |      |      | μM |
| Leucine                               | 0.6 | 3   | 6  | 15   | 30  | 60  | 120  | 300  | μM |
| Cystathionine                         |     |     |    |      |     |     |      |      | nM |
| S-Adenosylhomocysteine (SAH)          |     |     |    |      |     |     |      |      | nM |
| S Adenosyl-L-methionine (SAM)         |     |     |    |      |     |     |      |      | nM |
| Taurine                               |     |     |    |      |     |     |      |      | μM |
| Alanine                               |     |     |    |      |     |     |      |      | μM |
| Serine                                |     |     |    |      |     |     |      |      | μM |
| Glycine                               | 1   | 5   | 10 | 25   | 50  | 100 | 200  | 500  | μM |
| Glutamine                             |     |     |    |      |     |     |      |      | μM |
| Proline                               |     |     |    |      |     |     |      |      | μM |
| Lysine                                |     |     |    |      |     |     |      |      | μM |
| Arginine                              |     |     |    |      |     |     |      |      | μM |
| Valine                                |     |     |    |      |     |     |      |      | μM |
| Threonine                             |     |     |    |      |     |     |      |      | μM |
| Carnitine                             |     |     |    |      |     |     |      |      | μM |
| 5-Methyltetrahydrofolic acid (5-MTHF) | 5   | 25  | 50 | 125  | 250 | 500 | 1000 | 2500 | nM |

108

109 **Automated solid-phase extraction (SPE)**

110 An Eppendorf robot fitted with both a thermal mixer and vacuum manifold (EpMotion

111 5075vt, Germany) was programmed using the epBlue Client v. 40.6.2.6 software to

112 automate compound extractions from plasma samples (Figure 1). The protocol was  
113 developed to extract one 96-well plate of samples including standards, blanks and QCs.  
114 Internal standards, quality controls, calibration standards, the protein precipitation solution,  
115 the TCEP solution, 1% ascorbic acid MilliQ® H<sub>2</sub>O, and plasma samples were all placed in the  
116 robot.

#### 117 ***Protein precipitation***

118 Firstly, 300 µL of 1% (v/v) formic acid in LC-Grade MeOH (in P3) is transferred into the all  
119 wells (in P4) of the 96-well IMPACT® protein precipitation plate (Phenomenex®) fitted onto  
120 a square 96-well (2ml) collection plate (Phenomenex®). A volume of 100 µL of 1% ascorbic  
121 acid in MilliQ® H<sub>2</sub>O is dispensed into the first two wells as blanks with and without internal  
122 standards. The internal standard solution (20 µL from P3) is dispensed into the remaining  
123 wells of the plate. Standards (100 µL; in P2) and plasma samples (100 µL; in P1) are  
124 transferred into the corresponding wells of the plate. Quality controls (QCs; 100 µL in  
125 triplicate) are dispensed from P2 into three different locations across the plate, to enable  
126 quantification of QC fluctuations at different injection times across the 96-well plate.

127

#### 128 ***Mixing and vacuum extraction***

129 Once sample transfer is completed, the rack containing plasma samples in P1 is removed  
130 from the robot, recapped, and stored (-80°C). The protein precipitation filtration plate and  
131 catch plate are then placed on a thermomixer and agitated (5 min, 800rpm, room  
132 temperature). Once mixed, the plate is placed on the vacuum stand. A vacuum (450mbar,  
133 10 min) is applied and the extracted compounds are collected in the catch plate.

134

#### 135 ***Addition of the reducing agent TCEP***

136 After precipitation of the extracted compounds, the filter plate is discarded and 100 µL of  
137 Tris (2-carboxyethyl) phosphine (TCEP) is transferred from P3 to all wells of the collection  
138 plate. TCEP reduces the disulphide bonds within cystine and homocystine, so they can be  
139 quantified as cysteine and homocysteine.

140

#### 141 ***Mixing and final dilution***

142 The collection plate is placed on P1 for mixing (15 min, 800 rpm, room temperature), to  
143 provide sufficient contact time between the TCEP solution and the extracted compounds of  
144 interest for optimal compound reduction. A volume (200 µL) of 1% ascorbic acid in MilliQ®  
145 H<sub>2</sub>O is then added to each well. The plate is capped using a 96 square sealing mat  
146 (Phenomenex®), mixed (5 min, 800rpm, room temperature), and placed in the UHPLC  
147 system auto-sampler (10°C) for analysis.

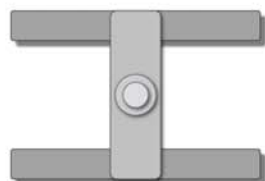

**Pipette holder stand**

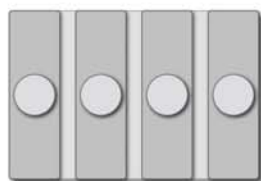

**Pipette head stand**

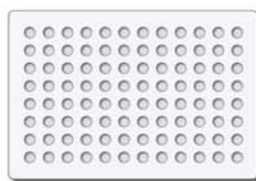

**300µl tips**

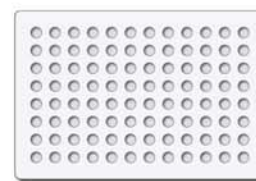

**1000µl tips**

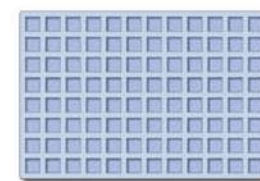

**Position 1 (P1)**  
- Sample rack  
- Collection plate  
- Thermomixer

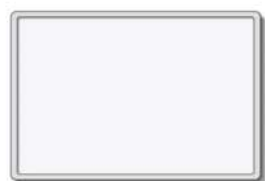

**Waste**

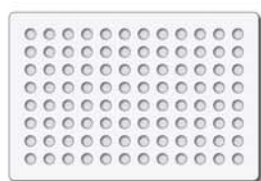

**50µl tips**

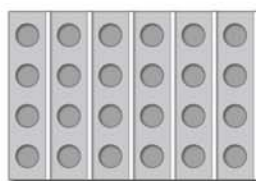

**Position 2 (P2)**  
- Calibration curve  
- Quality controls

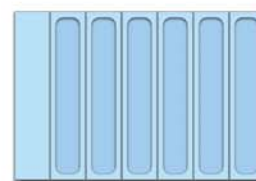

**Position 3 (P3)**  
- Protein precipitation  
- Water  
- Internal standard mix

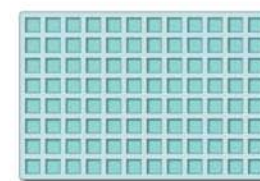

**Position 4 (P4)**  
- Filter plate  
- Collection plate  
- Vacuum position

149 **UHPLC/MS-MS working conditions**

150 Ultra-high-pressure liquid chromatography coupled with tandem mass spectrometry was  
151 performed using a Vanquish UHPLC system, coupled with a TSQ Quantiva triple quadrupole  
152 mass spectrometer (Thermo Scientific), using a heated electrospray ionisation source (H-ESI)  
153 in positive ionization mode. A Kinetex<sup>®</sup> EVO C18 100 Å 150x2.1mm 1.7µm column  
154 (Phenomenex<sup>®</sup>) at 40°C, coupled with a Krudkatcher (Phenomenex<sup>®</sup>) pre-column filter, was  
155 used for chromatography. A flow of 400 µL/min starting at 2% Acetonitrile and 98% mobile  
156 phase consisting of 5mM perfluorohexanoic acid (PFHA) in MilliQ<sup>®</sup> H<sub>2</sub>O was applied to the  
157 column, compounds of interest were eluted using an increasing acetonitrile gradient (Table  
158 2). The sample injection volume was 7 µL, and the run time was 15.5 minutes.

| Time | Flow (ml/min) | Percentage Acetonitrile (%) |
|------|---------------|-----------------------------|
| 0    | 0.4           | 2                           |
| 0.5  | 0.4           | 2                           |
| 2.5  | 0.4           | 15                          |
| 4.0  | 0.4           | 15                          |
| 6.3  | 0.4           | 20                          |
| 7.3  | 0.4           | 20                          |
| 9.5  | 0.4           | 95                          |
| 11.5 | 0.4           | 95                          |
| 11.6 | 0.4           | 2                           |
| 15.5 | 0.4           | 2                           |

159

160 **Data processing**

161 Data processing was carried out using Xcalibur version 4.0.27.19 (Thermo). Compounds  
162 were assigned specific retention times (based on the injection of pure compounds), and  
163 labelled standards for quantitation purposes. Unlabelled compounds that did not have  
164 labelled counterparts were assigned other labelled compounds with similar properties (*e.g.*  
165 SAM and SAH were both assigned SAH d4 as an internal standard for quantification). The  
166 range of expected concentrations of the compounds in standards S1-S8 (Table 1) were also  
167 included.

168 **Plasma sample validation**

169 The process was validated using stripped plasma and pooled plasma samples from pregnant  
170 women taking part in the Fish Oil in Pregnancy study. The validation included: 1) measures  
171 of specificity and selectivity based on retention times; chromatographic separations and  
172 spectral detection; 2) measures of matrix effects and standard recoveries by comparing  
173 pure stripped plasma versus spiked stripped plasma samples; and 3) measures of  
174 reproducibility by calculating coefficients of variation for multiple injections of the  
175 independent extractions of the same pooled plasma sample within and across multiple  
176 assay runs.

177

178

## 179 **Method development**

### 180 **Spectral Tuning**

181 Compounds were tuned on a TSQ Quantiva mass spectrometer using the TSQ Quantiva Tune  
182 Application v. 2.0.1292.15 software. Compound tuning identifies the lens' radio frequencies  
183 (RF) and respective collision energies required to focus and fragment a parent ion into its  
184 daughter ion(s). Each unlabelled standard was diluted from the stock solution in 1% ascorbic  
185 acid of MilliQ® H<sub>2</sub>O. The tuning solution of each individual compound was loaded into a  
186 tuning syringe. A LC flow (100-200 µl/min) was introduced into the mass spectrometer via  
187 'T' connector to mimic standard working conditions. After each standard was infused into  
188 the mass spectrometer via a syringe, a stepwise entry of ascending collision energies was  
189 applied to identify the ideal conditions for the detection of the most abundant daughter ion  
190 of the corresponding parent ion of interest. The mass of the most abundant daughter ion  
191 was identified along with its RF lens voltage and collision energy for each compound.

### 192 **UHPLC/MS-MS Instrument setup**

193 The instrument setup consisted of two stages: 1) chromatographic parameters; and 2)  
194 spectral conditions. Chromatographic flow gradient parameters were optimised to maximise  
195 compound separation whilst minimising assay run time. The optimised flow gradient is  
196 detailed in Table 2. Spectral parameters were optimised through an instrument setup that  
197 was drafted and edited throughout the method development process, including all  
198 compound names, their corresponding collision energies, RF lens, parent and daughter mass  
199 transitions, as well as expected retention times and windows.

### 200 **Chromatographic separations**

#### 201 *Chromatographic columns*

202 Solutions of each compound and internal standard were tested to determine their retention  
203 times under the gradient used. Initial work used a Kinetex® 2.6µm F5 100 Å 150x2.1 mm  
204 column (Phenomenex®) column to test chromatographic separations. However, some  
205 compound peaks showed poor resolution. A smaller particle size column, the Kinetex®  
206 1.7µm EVO C18 100 Å 150 x2.1 mm column (Phenomenex®) showed improved resolution,  
207 and was used for chromatographic separations instead.

#### 208 *Ion-pairing reagents*

209 Ion-pairing reagents are mobile phase additives pairing with highly ionic compounds to  
210 improve their adsorption to the stationary phase of the chromatographic column.  
211 Heptafluorobutyric acid (HFBA) was initially tested as an ion-pairing reagent, but exhibited  
212 poor retention of some compounds in this method. Perfluorohexanoic acid (PFHA)  
213 improved compound retention on the chromatographic column (5mM of PFHA in MilliQ®  
214 H<sub>2</sub>O) and was subsequently used instead.

215

216



217

## 218 Results and discussion

219 Parent-product ion transitions, collision energies, and RF lens of all compounds were  
220 obtained (Table 3). The compounds included in this panel are present in a wide range of  
221 metabolic networks and have been associated with health and disease outcomes (*i.e.* the 1-  
222 carbon metabolism, the urea cycle, ketogenic and glucogenic amino acids involved in the  
223 tricarboxylic acid (TCA) cycle, branched-chain amino acid (BCAA) metabolism,  
224 Trimethylamine N-Oxide (TMAO) metabolism, and gamma-aminobutyric acid (GABA)  
225 metabolism (14–21)). It has been argued that quantifying single blood biomarkers that are  
226 robustly associated with an outcome of interest (*e.g.* hsCRP, HbA1c) may be more clinically  
227 relevant for bigger picture recommendations and the development of public health policies  
228 (22). Whilst robust biomarkers must be profiled for diagnostic purposes, linking nutritional  
229 metabolites (*e.g.* 1-C metabolites, and amino acid profiles), to pre-established markers of  
230 health outcomes remains crucial for the characterisation of - potentially targetable -  
231 underlying mechanistic layers linking exposure to outcome (19,23). Of these mechanisms,  
232 epigenetic processes (such as DNA and histone methylation) are largely dependent on the  
233 availability of methyl (-CH<sub>3</sub>) groups released by methyl donors produced from the one-  
234 carbon metabolism (24–28). Briefly, this analytical panel measures metabolites that are at  
235 the intersection of lifestyle, nutrition, metabolism, and epigenetics (24–28). Whilst some of  
236 these compounds are unstable, prone to oxidation, and tend to degrade in samples stored  
237 for long periods, the exhaustiveness of our panel allows for a biologically relevant, yet still  
238 practically applicable coverage of multiple biological networks in a single 100µl plasma  
239 sample.

240

| Compound                                       | Retention Time (min) | Precursor (m/z) | Product | Collision Energy (V) | RF Lens (V) |
|------------------------------------------------|----------------------|-----------------|---------|----------------------|-------------|
| Taurine                                        | 0.7                  | 126.0           | 108.1   | 14                   | 63          |
| Taurine d4                                     | 0.7                  | 130.1           | 112.1   | 14                   | 63          |
| Aspartic acid                                  | 1.4                  | 134.0           | 74.0    | 20                   | 63          |
| Aspartic acid <sup>13</sup> C4 <sup>15</sup> N | 1.4                  | 139.0           | 74.2    | 15                   | 63          |
| OH-Proline                                     | 1.5                  | 132.1           | 86.1    | 20                   | 63          |
| Asparagine                                     | 1.6                  | 133.0           | 74.0    | 20                   | 63          |
| Serine                                         | 1.6                  | 106.0           | 60.0    | 10                   | 30          |
| Glutamine                                      | 1.9                  | 147.1           | 84.1    | 20                   | 63          |
| Glycine                                        | 1.9                  | 76.2            | 30.2    | 10                   | 30          |
| Glutamic acid                                  | 2.0                  | 148.1           | 84.0    | 20                   | 63          |
| Glutamic acid <sup>13</sup> C5 <sup>15</sup> N | 2.0                  | 154.1           | 89.1    | 15                   | 63          |
| Cysteine                                       | 2.0                  | 122.0           | 59.1    | 17                   | 63          |
| Threonine                                      | 2.1                  | 120.1           | 74.1    | 15                   | 63          |
| Threonine <sup>13</sup> C4 <sup>15</sup> N     | 2.1                  | 125.1           | 78.2    | 10                   | 63          |

|                                                |     |       |       |      |    |
|------------------------------------------------|-----|-------|-------|------|----|
| DMG                                            | 2.3 | 104.1 | 58.1  | 20   | 63 |
| DMG d3                                         | 2.3 | 107.1 | 61.1  | 20   | 63 |
| Betaine                                        | 2.6 | 118.2 | 58.15 | 28   | 63 |
| Betaine d3                                     | 2.6 | 121.1 | 61.1  | 28   | 63 |
| Alanine                                        | 2.8 | 90.1  | 44.1  | 10   | 34 |
| Amino adipic acid                              | 2.9 | 162.1 | 98.1  | 14   | 35 |
| Citrulline                                     | 3.3 | 176.1 | 159.0 | 10   | 32 |
| Proline                                        | 3.5 | 116.1 | 70.1  | 20   | 63 |
| Proline <sup>13</sup> C5 <sup>15</sup> N       | 3.6 | 122.1 | 75.2  | 16   | 63 |
| Homocysteine                                   | 3.9 | 136.0 | 90.1  | 13   | 63 |
| Homocysteine d4                                | 3.9 | 140.0 | 94.1  | 13   | 63 |
| Ethanolamine                                   | 4.0 | 62.3  | 44.1  | 10   | 30 |
| Carnitine                                      | 5.0 | 162.1 | 103.0 | 30   | 63 |
| Tyrosine                                       | 5.3 | 182.1 | 136.1 | 20   | 63 |
| Tyrosine <sup>13</sup> C9 <sup>15</sup> N      | 5.3 | 192.1 | 145.2 | 13   | 63 |
| Choline                                        | 5.5 | 104.2 | 60.2  | 20   | 63 |
| Methionine                                     | 5.7 | 150.1 | 104.1 | 10   | 63 |
| Methionine <sup>13</sup> C5 <sup>15</sup> N    | 5.7 | 156.1 | 109.1 | 10   | 63 |
| Valine                                         | 5.8 | 118.1 | 72.1  | 20   | 63 |
| Valine <sup>13</sup> C5 <sup>15</sup> N        | 5.8 | 124.1 | 77.2  | 10   | 63 |
| 5-Methyltetrahydrofolate (5-MTHF)              | 8.8 | 460.1 | 313.1 | 19   | 63 |
| 5-Methyltetrahydrofolate d3 (5-MTHF d3)        | 8.8 | 463.2 | 316.1 | 19.3 | 92 |
| Isoleucine                                     | 8.2 | 132.1 | 86.1  | 20   | 63 |
| Isoleucine <sup>13</sup> C6 <sup>15</sup> N    | 8.2 | 139.1 | 92.2  | 11   | 63 |
| Leucine                                        | 8.7 | 132.1 | 86.1  | 20   | 63 |
| Leucine <sup>13</sup> C6 <sup>15</sup> N       | 8.7 | 139.1 | 92.2  | 11   | 63 |
| Phenylalanine                                  | 8.8 | 166.1 | 120.1 | 20   | 63 |
| Phenylalanine <sup>13</sup> C9 <sup>15</sup> N | 8.8 | 176.1 | 129.1 | 14   | 63 |
| Cystathionine                                  | 8.9 | 223.0 | 134.1 | 14   | 58 |
| Cystathionine d4                               | 8.9 | 227.1 | 138.0 | 14   | 49 |
| Tryptophan                                     | 9.1 | 205.1 | 159.1 | 20   | 63 |
| 1-Methyl histidine                             | 9.1 | 170.1 | 124.1 | 20   | 63 |
| 3-Methyl histidine                             | 8.9 | 170.1 | 96.1  | 20   | 63 |
| Histidine                                      | 9.1 | 156.1 | 110.1 | 10   | 63 |
| Histidine <sup>13</sup> C6 <sup>15</sup> N3    | 9.1 | 165.1 | 87.2  | 30   | 63 |
| Ornithine                                      | 9.1 | 133.1 | 70.1  | 15   | 63 |
| Lysine                                         | 9.2 | 147.0 | 128.8 | 10   | 60 |
| S-Adenosyl-homocysteine (SAH)                  | 9.2 | 385.0 | 134.0 | 20   | 63 |

|                                            |     |       |       |    |    |
|--------------------------------------------|-----|-------|-------|----|----|
| S-Adenosyl-homocysteine d4                 | 9.2 | 389.0 | 136.0 | 18 | 63 |
| Arginine                                   | 9.2 | 175.1 | 70.1  | 20 | 63 |
| Arginine <sup>13</sup> C6 <sup>15</sup> N4 | 9.2 | 185.1 | 75.2  | 23 | 63 |
| S-Adosylmethionine (SAM)                   | 9.4 | 399.0 | 250.1 | 11 | 63 |

241

#### 242 **Compound recoveries and inter-assay coefficients of variations**

243 A number of plates were tested during method development. Quality control (QC) results of  
244 96-well plates profiled by the same user between March and July 2019 were reported in the  
245 following. QCs consisted of: QC-1 (stripped plasma at baseline), QC-2 (stripped plasma  
246 spiked with S7 concentration), QC-3 (stripped plasma spiked with S8 concentration), and  
247 QC-4 (real pooled plasma samples). Triplicate QCs were injected at three different locations  
248 of a 96-well plate to track compound performance and stability across a plate taking 26-30h  
249 to run. The injection time separating each set of QCs was approximately 10 hours allowing  
250 for a good representation of real changes occurring in samples throughout the plate.

251 Compound recoveries reported were calculated by comparing baseline stripped plasma with  
252 spiked stripped plasma (Table 4). Given that each compound behaves slightly differently  
253 across plates profiled months apart, outliers were excluded from the total recovery  
254 calculations (1, 2, and 3). The exclusion criteria were  $\pm 2$ sds for most compounds, and  $\pm 1$ sd  
255 for those that tended to fluctuate more markedly over 5 months of runs (Asparagine,  
256 Cysteine, Betaine, Ethanolamine, and S-Adosylhomocysteine). The reported recoveries  
257 were mostly for the S7 spike, given that it is closer to physiological ranges of compound  
258 concentrations in plasma, and is therefore more biologically relevant. For metabolites  
259 exhibiting lower sensitivity or higher baseline levels in stripped plasma, a higher spike  
260 concentration S8 was used for this calculation. These compounds were Cysteine, Betaine,  
261 Alanine, S-Adosylhomocysteine, Asparagine, and Glutamic Acid. All compounds recovered  
262 within two standard deviations of 100% recovery, highlighting a reliable quantitation of  
263 compounds of interest (Table 4). 5-Methyltetrahydrofolate (5-MTHF) had an acceptable  
264 recovery but results for this compound were inconsistent across runs. This is a clear  
265 downfall of a complex panel attempting to quantify multiple compounds simultaneously.  
266 Regardless of the acceptable recoveries in some plates, the inconsistencies between plates  
267 highlight the need to quantify folate derivatives such as 5-MTHF in a specialized method  
268 with minimal extraction time and stringent, light-protected blood collection methods given  
269 the highly unstable and oxidative nature of these compounds (29,30).

#### 270 **Mean concentration calculations across assays**

271 Compound concentrations were reported as average concentrations of pooled plasma QCs  
272 within the  $\pm 2$  sds of the average across plates profiled between March and July 2019.  
273 Compounds reported as below LOQ (limit of quantification) were those exhibiting  
274 concentrations below the lowest calibration curve standard (S1).

#### 275 **Reproducibility, inter- and intra-assay coefficients of variation**

276 Compound reproducibilities were calculated by comparing compound concentrations 1) at  
277 different locations on the same 96-well plate to monitor fluctuations across a run (every

278 10h); and 2) between plates by calculating standard deviations of pooled plasma QCs (QC4)  
279 injected in different plates, across several months. Inter- and intra-assay variabilities were  
280 reported (Table 4), most of which were below our 20% cut-off, pinpointing a stable and  
281 consistent quantitation of these metabolites for the same samples both within and between  
282 assays. For compounds exhibiting low concentrations in pooled plasma, inter- and intra-  
283 assay reproducibility was reported for spiked stripped plasma samples exhibiting higher  
284 concentrations. These include: Aspartic acid, OH-Proline, Aminoadipic Acid, and 3-  
285 Methylhistidine. The rationale behind that substitution is that very low concentrations are  
286 bound to give falsely higher coefficients of variations, therefore falsely lower reproducibility.

**Table 4: Compound recoveries and reproducibility in stripped and pooled plasma**

| Compound      | Recoveries in stripped plasma (Rounded %) | Mean levels in pooled fasted plasma | Unit | Coefficient of variation of pooled plasma concentration within a plate or intra-assay variability (Rounded %) | Coefficient of variation of pooled plasma concentration across plates or inter-assay variability (Rounded %) |
|---------------|-------------------------------------------|-------------------------------------|------|---------------------------------------------------------------------------------------------------------------|--------------------------------------------------------------------------------------------------------------|
| Lysine        | 105                                       | 178                                 | μM   | 11                                                                                                            | 19                                                                                                           |
| Taurine       | 111                                       | 33                                  | μM   | 14                                                                                                            | 25                                                                                                           |
| OH-Proline    | 91                                        | 8                                   | μM   | 6                                                                                                             | 12                                                                                                           |
| Aspartic acid | 96                                        | 4                                   | μM   | 7                                                                                                             | 13                                                                                                           |
| Glutamine     | 102                                       | 678                                 | μM   | 6                                                                                                             | 22                                                                                                           |
| Serine        | 90                                        | 79                                  | μM   | 9                                                                                                             | 8                                                                                                            |
| Glycine       | 102                                       | 144                                 | μM   | 10                                                                                                            | 13                                                                                                           |
| Asparagine    | 87                                        | 31                                  | μM   | 5                                                                                                             | 8                                                                                                            |
| Glutamic acid | 91                                        | 40                                  | μM   | 4                                                                                                             | 7                                                                                                            |
| DMG           | 92                                        | 2                                   | μM   | 5                                                                                                             | 20                                                                                                           |
| Citrulline    | 90                                        | 15                                  | μM   | 10                                                                                                            | 20                                                                                                           |
| Proline       | 91                                        | 141                                 | μM   | 4                                                                                                             | 6                                                                                                            |
| Betaine       | 79                                        | 13                                  | μM   | 7                                                                                                             | 13                                                                                                           |
| Threonine     | 84                                        | 138                                 | μM   | 5                                                                                                             | 9                                                                                                            |
| Cysteine      | 77                                        | 47                                  | μM   | 10                                                                                                            | 17                                                                                                           |
| Alanine       | 91                                        | 260                                 | μM   | 7                                                                                                             | 10                                                                                                           |
| Homocysteine  | 77                                        | 1                                   | μM   | 14                                                                                                            | 20                                                                                                           |
| Ornithine     | 83                                        | 14                                  | μM   | 22                                                                                                            | 13                                                                                                           |
| Valine        | 92                                        | 157                                 | μM   | 4                                                                                                             | 8                                                                                                            |
| Carnitine     | 109                                       | 25                                  | μM   | 11                                                                                                            | 22                                                                                                           |
| Tyrosine      | 89                                        | 36                                  | μM   | 4                                                                                                             | 5                                                                                                            |

|                                   |     |       |    |     |     |
|-----------------------------------|-----|-------|----|-----|-----|
| Choline                           | 116 | 9     | μM | 10  | 15  |
| Methionine                        | 95  | 19    | μM | 4   | 7   |
| Cystathionine                     | 97  | 99    | nM | 14  | 18  |
| Phenylalanine                     | 92  | 48    | μM | 3   | 2   |
| Isoleucine                        | 91  | 43    | μM | 4   | 6   |
| Leucine                           | 90  | 80    | μM | 4   | 8   |
| Histidine                         | 100 | 76    | μM | 7   | 9   |
| Arginine                          | 96  | 60    | μM | 5   | 7   |
| S-Adenosylhomocysteine (SAH)      | 79  | 31    | nM | 21  | 15  |
| S-Adosylmethionine (SAM)          | 99  | 61    | nM | 14  | 18  |
| Tryptophan                        | 95  | 44    | μM | 12  | 22  |
| 1-Methyl Histidine                | 81  | 3     | μM | 6   | 19  |
| 3-Methyl Histidine                | 88  | 5     | μM | 8   | 9   |
| Aminoadipic acid                  | 81  | 3     | μM | 9   | 10  |
| Ethanolamine                      | 128 | <LOQ* | μM | N/A | N/A |
| 5-Methyltetrahydrofolate (5-MTHF) | 91  | 27    | nM | N/A | N/A |

288

## 289 Conclusion

290 We have developed, robotically automated, and validated a methodology for the  
291 simultaneous quantitation of an extensive metabolic panel of 1-C compounds, amino acids  
292 and precursors, as well as plasmalogens in human plasma. Our method has two key  
293 advantages over existing methods: Firstly, our technique is highly reproducible and robust  
294 due to the robotic automation of sample preparation and compound extraction. The ability  
295 to measure metabolites such as these directly from their sample vial with no manual  
296 ‘intervention’ is attractive from an analysis and laboratory staffing point of view. Secondly,  
297 our method has a greater coverage of compounds from a number of metabolic pathways,  
298 when compared to previous methods (4,5), which provides simultaneous information on  
299 interconnected biological processes rather than focusing on just one. These advantages  
300 mean that this method has the potential for wide-spread application to large cohorts in a  
301 wide range of fields (7,31–33).

## 302 References

- 303 1. Van Slyke DD. Physiology of the amino acids. *Nature* (1942) **149**:342–345.  
304 doi:10.1038/149342a0
- 305 2. Vinayavekhin N, Saghatelian A. ‘Untargeted Metabolomics’, in *Current Protocols in Molecular*  
306 *Biology* (Hoboken, NJ, USA: John Wiley & Sons, Inc.), Unit 30.1.1-24.  
307 doi:10.1002/0471142727.mb3001s90
- 308 3. Roberts LD, Souza AL, Gerszten RE, Clish CB. Targeted metabolomics. *Curr Protoc Mol Biol*  
309 (2012) **Chapter 30**:Unit 30.2.1-24. doi:10.1002/0471142727.mb3002s98
- 310 4. Guiraud SP, Montoliu I, Da Silva L, Dayon L, Galindo AN, Corthésy J, Kussmann M, Martin F-P.  
311 High-throughput and simultaneous quantitative analysis of homocysteine-methionine cycle  
312 metabolites and co-factors in blood plasma and cerebrospinal fluid by isotope dilution LC-  
313 MS/MS. *Anal Bioanal Chem* (2017) **409**:295–305. doi:10.1007/s00216-016-0003-1
- 314 5. Da Silva L, Collino S, Cominetti O, Martin F-P, Montoliu I, Moreno SO, Corthésy J, Kaput J,  
315 Kussmann M, Monteiro JP, et al. High-throughput method for the quantitation of metabolites  
316 and co-factors from homocysteine–methionine cycle for nutritional status assessment.  
317 *Bioanalysis* (2016) **8**:1937–1949. doi:10.4155/bio-2016-0112
- 318 6. Wu G. Functional amino acids in nutrition and health. *Amino Acids* (2013) **45**:407–411.  
319 doi:10.1007/s00726-013-1500-6
- 320 7. Newgard CB, An J, Bain JR, Muehlbauer MJ, Stevens RD, Lien LF, Haqq AM, Shah SH, Arlotto  
321 M, Slentz CA, et al. A Branched-Chain Amino Acid-Related Metabolic Signature that  
322 Differentiates Obese and Lean Humans and Contributes to Insulin Resistance. *Cell Metab*  
323 (2009) **9**:311–326. doi:10.1016/J.CMET.2009.02.002
- 324 8. Mayers JR, Wu C, Clish CB, Kraft P, Torrence ME, Fiske BP, Yuan C, Bao Y, Townsend MK,  
325 Tworoger SS, et al. Elevation of circulating branched-chain amino acids is an early event in  
326 human pancreatic adenocarcinoma development. *Nat Med* (2014) **20**:1193–1198.  
327 doi:10.1038/nm.3686
- 328 9. Shim J-S, Oh K, Kim HC. Dietary assessment methods in epidemiologic studies. *Epidemiol*  
329 *Health* (2014) **36**:e2014009. doi:10.4178/epih/e2014009
- 330 10. Ilić M, Hofman P. Pros: Can tissue biopsy be replaced by liquid biopsy? *Transl lung cancer Res*

- 331 (2016) 5:420–3. doi:10.21037/tlcr.2016.08.06
- 332 11. Canepa A, Filho JCD, Gutierrez A, Carrea A, Forsberg A, Nilsson E, Verrina E, Perfumo F,  
333 Bergström J. Free amino acids in plasma, red blood cells, polymorphonuclear leukocytes, and  
334 muscle in normal and uraemic children. *Nephrol Dial Transplant* (2002) **17**:413–421.  
335 doi:10.1093/ndt/17.3.413
- 336 12. Reed MC, Nijhout HF, Sparks R, Ulrich CM. A mathematical model of the methionine cycle. *J*  
337 *Theor Biol* (2004) **226**:33–43. doi:10.1016/J.JTBI.2003.08.001
- 338 13. Duncan TM, Reed MC, Nijhout HF. The relationship between intracellular and plasma levels of  
339 folate and metabolites in the methionine cycle: A model. *Mol Nutr Food Res* (2013) **57**:628–  
340 636. doi:10.1002/mnfr.201200125
- 341 14. KEGG PATHWAY: Citrate cycle (TCA cycle) - Reference pathway. Available at:  
342 [https://www.genome.jp/kegg-bin/show\\_pathway?map00020](https://www.genome.jp/kegg-bin/show_pathway?map00020) [Accessed February 20, 2019]
- 343 15. KEGG PATHWAY: hsa00280. Available at: [https://www.genome.jp/dbget-](https://www.genome.jp/dbget-bin/www_bget?pathway+hsa00280)  
344 [bin/www\\_bget?pathway+hsa00280](https://www.genome.jp/dbget-bin/www_bget?pathway+hsa00280) [Accessed February 20, 2019]
- 345 16. KEGG PATHWAY: One carbon pool by folate - Reference pathway. Available at:  
346 [https://www.genome.jp/kegg-bin/show\\_pathway?map=map00670&show\\_description=show](https://www.genome.jp/kegg-bin/show_pathway?map=map00670&show_description=show)  
347 [Accessed February 20, 2019]
- 348 17. KEGG PATHWAY: Cysteine and methionine metabolism - Reference pathway. Available at:  
349 [https://www.genome.jp/kegg-bin/show\\_pathway?map=map00270&show\\_description=show](https://www.genome.jp/kegg-bin/show_pathway?map=map00270&show_description=show)  
350 [Accessed February 20, 2019]
- 351 18. KEGG PATHWAY: hsa00220. Available at: [https://www.genome.jp/dbget-](https://www.genome.jp/dbget-bin/www_bget?hsa00220)  
352 [bin/www\\_bget?hsa00220](https://www.genome.jp/dbget-bin/www_bget?hsa00220) [Accessed February 20, 2019]
- 353 19. Abbenhardt C, Miller JW, Song X, Brown EC, Cheng T-YD, Wener MH, Zheng Y, Toriola AT,  
354 Neuhaus ML, Beresford SAA, et al. Biomarkers of One-Carbon Metabolism Are Associated  
355 with Biomarkers of Inflammation in Women. *J Nutr* (2014) **144**:714–721.  
356 doi:10.3945/jn.113.183970
- 357 20. Ducker GS, Rabinowitz JD. One-Carbon Metabolism in Health and Disease. *Cell Metab* (2017)  
358 **25**:27–42. doi:10.1016/j.cmet.2016.08.009
- 359 21. Cho CE, Caudill MA. Trimethylamine- N -Oxide: Friend, Foe, or Simply Caught in the Cross-  
360 Fire? *Trends Endocrinol Metab* (2017) **28**:121–130. doi:10.1016/j.tem.2016.10.005
- 361 22. Andraos S, Wake M, Saffery R, Burgner D, Kussmann M, O’Sullivan J. Perspective: Advancing  
362 Understanding of Population Nutrient–Health Relations via Metabolomics and Precision  
363 Phenotypes. *Adv Nutr* (2019) doi:10.1093/advances/nmz045
- 364 23. Shin S-Y, Fauman EB, Petersen A-K, Krumsiek J, Santos R, Huang J, Arnold M, Erte I, Forgetta  
365 V, Yang T-P, et al. An atlas of genetic influences on human blood metabolites. *Nat Genet*  
366 (2014) **46**:543–550. doi:10.1038/ng.2982
- 367 24. Ulrey CL, Liu L, Andrews LG, Tollefsbol TO. The impact of metabolism on DNA methylation.  
368 *Hum Mol Genet* (2005) **14**:R139–R147. doi:10.1093/hmg/ddi100
- 369 25. Mentch SJ, Locasale JW. One-carbon metabolism and epigenetics: understanding the  
370 specificity. *Ann N Y Acad Sci* (2016) **1363**:91–98. doi:10.1111/nyas.12956
- 371 26. Knight AK, Park HJ, Hausman DB, Fleming JM, Bland VL, Rosa G, Kennedy EM, Caudill MA,  
372 Malysheva O, Kauwell GPA, et al. Association between one-carbon metabolism indices and



- 373 DNA methylation status in maternal and cord blood. *Sci Rep* (2018) **8**:16873.  
374 doi:10.1038/s41598-018-35111-1
- 375 27. Clare CE, Brassington AH, Kwong WY, Sinclair KD. One-Carbon Metabolism: Linking Nutritional  
376 Biochemistry to Epigenetic Programming of Long-Term Development. *Annu Rev Anim Biosci*  
377 (2019) **7**:263–287. doi:10.1146/annurev-animal-020518-115206
- 378 28. James PT, Dominguez-Salas P, Hennig BJ, Moore SE, Prentice AM, Silver MJ. Maternal One-  
379 Carbon Metabolism and Infant DNA Methylation between Contrasting Seasonal  
380 Environments: A Case Study from The Gambia. *Curr Dev Nutr* (2019) **3**:nzy082.  
381 doi:10.1093/cdn/nzy082
- 382 29. Spiros D. Garbis †, Alida Melse-Boonstra ‡, Clive E. West ‡,§ and, Richard B. van Breemen\* †.  
383 Determination of Folates in Human Plasma Using Hydrophilic Interaction  
384 Chromatography–Tandem Mass Spectrometry. (2001) doi:10.1021/AC010741Y
- 385 30. World Health Organization, Food and Agriculture Organization of the United Nations. Chapter  
386 4. Folate and folic acid. Rome (2002).
- 387 31. Zwart SR, Gibson CR, Mader TH, Ericson K, Ploutz-Snyder R, Heer M, Smith SM. Vision  
388 Changes after Spaceflight Are Related to Alterations in Folate– and Vitamin B-12–Dependent  
389 One-Carbon Metabolism. *J Nutr* (2012) **142**:427–431. doi:10.3945/jn.111.154245
- 390 32. Blomstrand E, Jackman SR, Witard OC, Philp A, Wallis GA, Baar K, Tipton KD. Branched-Chain  
391 Amino Acid Ingestion Stimulates Muscle Myofibrillar Protein Synthesis following Resistance  
392 Exercise in Humans. *Front Physiol* (2017) **8**:390. doi:10.3389/fphys.2017.00390
- 393 33. Labuschagne CF, van den Broek NJF, Mackay GM, Vousden KH, Maddocks ODK. Serine, but  
394 Not Glycine, Supports One-Carbon Metabolism and Proliferation of Cancer Cells. *Cell Rep*  
395 (2014) **7**:1248–1258. doi:10.1016/J.CELREP.2014.04.045

396

### 397 **Acknowledgments**

398 This study was funded by a Faculty Research Development fund grant to MK, and a MBIE  
399 Catalyst grant (The New Zealand-Australia LifeCourse Collaboration on Genes, Environment,  
400 Nutrition and Obesity (GENO); UOAX1611; to JOS). SA is the recipient of a New Zealand  
401 International Doctoral Research Scholarship 2017. Samples used in this study were collected  
402 as part of the Fish Oil in Pregnancy Study, which was funded by a Health Research Council  
403 Emerging Researcher First Grant and by a project grant from the A Better Start National  
404 Science Challenge and Cure Kids.

405 The authors would like to thank PhD student Vidit Satokar for collecting the samples as part  
406 of the Fish Oil in Pregnancy study, and the participants of the trial.

### 407 **Conflicts of interest**

408 The authors declare no competing financial interest

409

410

411
